# Supplementary material for: Measurement of amplitude and medium of light waves
Source: Research Square preprint supplement (doi:10.21203/rs.3.rs-2240025/v1), 2022-11-07
Supplement: Supplementary file 1 [file cf6e76b63c775b405d6d76fa.docx]

**Extended Data for**

Measurement of amplitude and medium of light waves

E1 Polarization Azimuth of Reflected Light, Incidence Angle 17°

| Material | P1, | 00 | 300 | 450 | 600 | 900 |
| --- | --- | --- | --- | --- | --- | --- |
| Cu | P2, | 00 | 1500 | 1350 | 1200 | 900 |
| 304 | P2, | 00 | 1500 | 1350 | 1200 | 900 |
| Si | P2, | 00 | 1500 | 1350 | 1200 | 900 |

The angle measurement error is less than degrees.

Another method is to use a triatomic molecule aqueous solution CaCl2, MgCl2 which has a similar behaviourto water. When the solution concentration increases, the distance between the solute molecules decreases, which is equivalent to the decrease of r, making the substance's density increase. The experimental value of 0.5% concentration was used as the benchmark. The refractive index values are calculated from equation(6). The calculated values and experimental values of the refractive index are in E2 and E3.


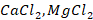

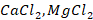


E2 Calculated and experimental values of refractive index of solutions, light wavelength 589 nm.

| Concentration  % | n |  |  | Calculated  by formula 6 | n  Calculated  by formula 6 | error |
| --- | --- | --- | --- | --- | --- | --- |
| 0.5 | 1.3342 | 0.78009 | 1.0024 |  |  |  |
| 10 | 1.3575 | 0.84281 | 1.0835 | 0.84320 | 1.3576 | +0.01% |
| 20 | 1.3839 | 0.91518 | 1.1775 | 0.91636 | 1.3843 | +0.03% |
| 30 | 1.4124 | 0.99487 | 1.2816 | 0.99737 | 1.4133 | +0.06% |
| 40 | 1.4420 | 1.07936 | 1.3957 | 1.08616 | 1.4444 | +0.16% |

It can be seen from E2, that the error between theexperimental value and the calculated value of n calculated by formula (6) is not more than 0.16%. The Lorentz-Lorenz [1] formula is , N is the number of molecules per unit volume, after performing the same calculation, and the error of the same calculation is 18 times larger than that of formula (6).

E3 Calculated and experimental values of refractive index of solution, with wavelength 589nm.

| Concentration (%) | n |  |  | calculated  by formula  (6) | n  Calculated  by formula  (6) | error |
| --- | --- | --- | --- | --- | --- | --- |
| 0.5 | 1.3343 | 0.78036 | 1.0022 |  |  |  |
| 10 | 1.3587 | 0.84607 | 1.0826 | 0.84296 | 1.3576 | -0.08% |
| 20 | 1.3859 | 0.92072 | 1.1742 | 0.91429 | 1.3836 | -0.17% |
| 30 | 1.4148 | 1.00166 | 1.2763 | 0.99379 | 1.4120 | -0.20% |

It can be seen from E3, that the error between theexperimental value and the calculated value of n calculated by formula (6) is not more than 0.20%. The Lorentz-Lorenz [1] formula is , N is the number of molecules per unit volume, after performing the same calculation,and the error of the same calculation is 7 times larger than that of formula (6).

The second experiment measures the surface electronselection on the amplitude of light.

P—indicates that the polarization direction of the light is parallel to the radial direction of the electrons on the surface of the C knife edge, and P⊥indicates that the polarization direction of the light is perpendicular to the radial direction of the electrons on the surface of the C knife edge. I(P—) is the illuminance (lx) with the polarization direction parallel to the radial direction of the electrons on the surface of the knife edge C, I(P⊥) is the illuminance (lx) with the polarization direction perpendicular to the radial direction of the electrons on the surface of the knife edge C. This experiment measures the illumination I(P—),I(P⊥)at different DO distances. The experimental results are shown in E4.

E4 illuminance和 with the DO distance

| DO  distance | illuminant  I()  100 lx | illuminant  I()  100 lx | 40mm  I()  lx | 40mm  I()  lx | 60mm  I()  lx | 60mm  I()  lx | 80mm  I()  lx | 80mm  I()  lx |
| --- | --- | --- | --- | --- | --- | --- | --- | --- |
| illuminance | 0.91 | 1.07 | 0.16 | 0.2 | 0.05 | 0.07 | 0.02 | 0.03 |
| illuminance | 0.91 | 1.06 | 0.16 | 0.2 | 0.05 | 0.06 | 0.02 | 0.03 |
| illuminance | 0.9 | 1.06 | 0.16 | 0.19 | 0.05 | 0.07 | 0.02 | 0.03 |
| illuminance | 0.91 | 1.07 | 0.16 | 0.2 | 0.05 | 0.07 | 0.02 | 0.03 |
| STDEV | 0.005 | 0.0058 | 0 | 0.005 | 0 | 0.005 | 0 | 0 |
| AVERAGE | 0.908 | 1.065 | 0.16 | 0.198 | 0.05 | 0.068 | 0.02 | 0.03 |
|  |  |  |  |  |  |  |  |  |
|  |  | 1.17 |  | 1.24 |  | 1.36 |  | 1.50 |

## E5 The measure the speed of light outside a solid surface

In Figure 2(a), L is a 30-mW semiconductor laser with a wavelength of 532 nm and emits circularly polarized light with a divergence angle of 2.6–5.3 mrad. AB is a rectangular copper sheet with the dimensions of 30 mm (length) × 2.856 mm (width) × 0.187 mm (thickness). The experiments were performed using a rectangular copper sheet having width in the range of 1–4 mm. When the width of the copper sheet AB exceeded 3 mm, the interference fringe was very thin, which was not conducive to observation. When the width of the copper sheet AB was 1 mm, very few interference fringes were observed, causing difficulties in observation. The effective observations were possible only with a width of ~3 mm for the copper sheet AB. The thickness of the copper sheet AB is 0.187 mm. O is the screen used to record and observe the interference fringes.Distances LA, CB, and LO are 1,200, 170 ± 30, and 15,000 mm, respectively. AB is perpendicular to the ground and is in the middle of the light beam.

C is a single slit (Figure 2(b)), where C1 and C2 are two plates of the same length, i.e., 50 mm. In the experiment, two 0.75-mm-thick single-crystal silicon wafers were used for C1 and C2.The green circle G indicates the area for light beam, while F is a support and D is a baffle. A steel stopper E was placed between C1 and C2. The dimensions of the stopper E were 150 mm × 12 mm × thickness. The thicknessx of the stopper E was that of a single slit width, which ranged from 0.025 mm to 0.250 mm. The height of the single slit is in the horizontal direction, and the length is in the direction of light propagation. the shadow on the left edge of C is cast in the middle of AB.

The experiment required the light beam to pass parallel through the slit C. During the experiment, the interference fringes on the screen appear symmetrically above and below. The top of the arc in the interference fringe is at the center. The surfaces of the flat plates of the slit C and the stopper E must be highly glabrous and clean (Ra < 1 µm), which was essential for the successful experiments. The position measurements of the interference fringes were recorded using a digital camera and the data were saved in a computer. A digital camera was located 65–75 mm from screen O, with pixel sizes of 5120 × 3840. CAD software was used to measure the position of the interference fringes. The mean value and standard deviation were used for statistical analysis. No other gratings and lenses were used in these experiments (Figure 2).

Experiments were measured at 20,1atm. The experimental data in this paper were collected at the humidity level 0.64 ~ 0.79.Greater humidity results in a smaller phase difference.Measuring this effect would be stronger in a vacuum.

the interference fringe in the middle of the image (top of the arc in Figure 5(b)), which is due to the interference between the light from B (passing through the single slit) and the light from A.

E6 The experimental data for x=0.248mm . The position y(n) of the interference fringes and the distance d(n) between two dark strips, where n is the length of the unit in CAD software. Two groups of data are represented in the following table.

|  | d(n) | y(n) |  | d(n) | y(n) |  |
| --- | --- | --- | --- | --- | --- | --- |
|  | 29.57 | 2.77 |  | 33.58 | 4.62 |  |
|  | 29.88 | 2.77 |  | 33.27 | 4.93 |  |
|  | 30.19 | 3.08 |  | 33.89 | 4.93 |  |
|  | 30.19 | 3.08 |  | 33.89 | 4.31 |  |
| AVERAGE | 29.958 | 2.925 | y/d=0.098 | 33.658 | 4.698 | y/d=0.14 |
| STDEV | 0.297 | 0.179 |  | 0.297 | 0.297 |  |
|  |  |  |  | AVERAGE | y/d=0.12 | Near 0 |


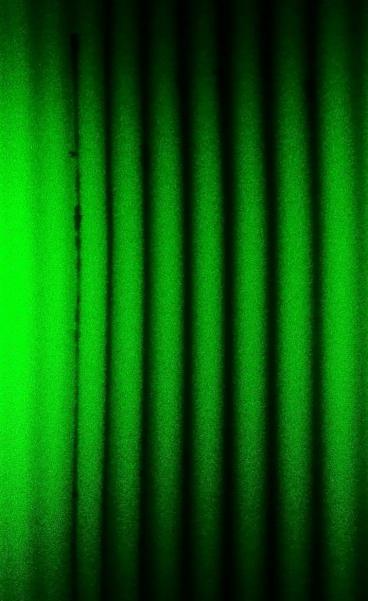

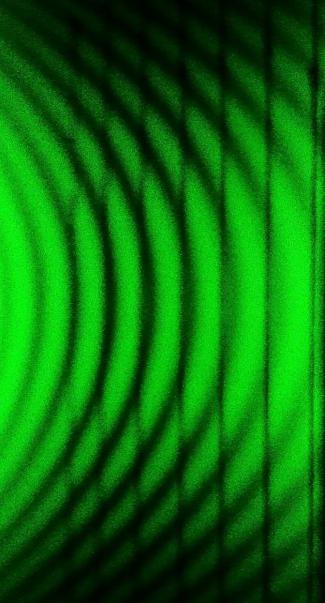


(a)Δα= 0 (b)Δαnear0

**Figure 5.** Interference fringes showing the phase difference. (a) Interference stripes without passing through the single slit C (Δα= 0) and (b) Interference stripes for adding a single slit C in light path LB (x = 0.248 mm and Δα near 0).

When the distance between single slits drops from a large distance to x=0.248mm, the phase difference Δαis still close to zero. This proves that there is no change in the optical distance of the optical path LB.

E7 The experimental data for Figure 2(c). x=0.050mm. The position y(n) of the interference fringes and the distance d(n) between two dark strips, where n is the length of the unit in CAD software. Two groups of data are represented in the following table.

|  | d(n) | y(n) |  | d(n) | y(n) |  |
| --- | --- | --- | --- | --- | --- | --- |
|  | 26.98 | 13.67 |  | 25.59 | 13.67 |  |
|  | 26.98 | 14.02 |  | 25.94 | 13.32 |  |
|  | 26.63 | 14.02 |  | 25.59 | 13.67 |  |
|  | 26.63 | 13.67 |  | 25.94 | 13.32 |  |
| AVERAGE | 26.805 | 13.845 | y/d=0.517 | 25.765 | 13.495 | y/d=0.524 |
| STDEV | 0.202 | 0.202 |  | 0.202 | 0.202 |  |
|  |  |  |  | AVERAGE | y/d=0.52 | π |

E8 The experimental data for Figure 2(d).x=0.025mm.The position y(n) of the interference fringes and the distance d(n) between two dark strips, where n is the length of the unit in CAD software. Two groups of data are represented in the following table.

|  | d(n) | y(n) |  | d(n) | y(n) |  |
| --- | --- | --- | --- | --- | --- | --- |
|  | 27.56 | 1.38 |  | 25.83 | 0.69 |  |
|  | 27.32 | 1.38 |  | 26.18 | 1.03 |  |
|  | 27.56 | 1.72 |  | 26.21 | 0.84 |  |
|  | 27.21 | 1.95 |  | 25.83 | 1.03 |  |
| AVERAGE | 27.413 | 1.608 | y/d=0.059 | 25.918 | 0.898 | y/d=0.035 |
| STDEV | 0.176 | 0.279 |  | 0.2118 | 0.165 |  |
|  |  |  |  | AVERAGE | y/d=0.047 | 2π |

E9 The width and thickness of AB and the length of the slit C .

| data | AB width mm | AB thickness mm | Si length mm |
| --- | --- | --- | --- |
|  | 2.858 | 0.187 | 50.02 |
|  | 2.862 | 0.188 | 50.04 |
|  | 2.852 | 0.187 | 49.98 |
|  | 2.85 | 0.186 | 50.02 |
| AVERAGE | 2.856 | 0.187 | 50.015 |
| STDEV | 0.006 | 0.001 | 0.025 |

E10 The thickness of the steel stopper E is x

| steel stopper E | thickness mm | thickness mm | thickness mm |
| --- | --- | --- | --- |
| x | 0.248 | 0.05 | 0.026 |
| x | 0.247 | 0.05 | 0.025 |
| x | 0.247 | 0.05 | 0.025 |
| x | 0.248 | 0.051 | 0.025 |
| AVERAGE x | 0.248 | 0.050 | 0.025 |
| STDEV | 0.001 | 0.001 | 0.001 |
